# Supplementary material for: Integrated Molecular Characterization of Intraductal Papillary Mucinous Neoplasms: An NCI Cancer Moonshot Precancer Atlas Pilot Project
Source: Cancer Res Commun. 2023 Oct 10;3(10):2062–73. doi: 10.1158/2767-9764.CRC-22-0419 (PMC10563795; doi:10.1158/2767-9764.CRC-22-0419)
Supplement: Supplementary Table 1 — List of compartments dissected by LCM [file crc-22-0419-s01.xlsx]

## Sheet: Tabelle1
Supplementary Table 1: List of compartments dissected by LCM
Patient number	Lesion-type	Patient sex	Age at resection	Comment
1	Acinar	male	56	LCM
	HG	male	56	LCM
	LG	male	56	LCM
	ND	male	56	LCM
	PBMC	male	56	blood
2	Acinar	female	70	LCM
	HG	female	70	LCM
	ND	female	70	LCM
	PBMC	female	70	blood
3	Acinar	female	82	LCM
	HG	female	82	LCM
	LG	female	82	LCM
	ND	female	82	LCM
	PBMC	female	82	blood
4	HG	female	71	LCM
	LG	female	71	LCM
	ND	female	71	LCM
5	HG	female	72	LCM
	LG	female	72	LCM
6	HG	male	74	LCM
	LG	male	74	LCM
	PBMC	male	74	blood
7	Acinar	male	70	Removed from DNA analysis
	HG	male	70
	PBMC	male	70
8	Acinar	male	71	LCM
	HG	male	71	LCM
	ND	male	71	LCM
	Duodenum	male	71	whole slide DNA
9	HG	male	71	LCM
	LG	male	71	LCM
	Spleen	male	71	whole slide DNA
10	Acinar	male	60	LCM
	LG	male	60	LCM
	ND	male	60	LCM
	Spleen	male	60	whole slide DNA
11	Acinar	female	57	LCM
	HG	female	57	LCM
	ND	female	57	LCM
	normal_pancreas	female	57	whole slide DNA
12	HG	male	77	LCM
	LG	male	77	LCM
	ND	male	77	LCM
13	Acinar	male	59	LCM
	HG	male	59	LCM
	ND	male	59	LCM
	PBMC	male	59	blood
14	HG	male	58	LCM
	PBMC	male	58	blood
15	HG	male	76	LCM
	LG	male	76	LCM
	PBMC	male	76	blood
16	HG	male	78	LCM
	PBMC	male	78	blood
	PDAC	male	78	LCM
17	HG	male	72	LCM
	LG	male	72	LCM
	PBMC	male	72	blood
18	HG	female	61	LCM
	LG	female	61	LCM
	ND	female	61	LCM
	PDAC	female	61	LCM
19	HG	female	81	LCM
	LG	female	81	LCM
20	Acinar	male	57	LCM
	HG	male	57	LCM
	LG	male	57	LCM
	ND	male	57	LCM
21	HG	female	72	LCM
	LG	female	72	LCM
	ND	female	72	LCM
22	Acinar	female	65	LCM
	HG	female	65	LCM
	LG	female	65	LCM
	ND	female	65	LCM
23	HG	male	70	LCM
	LG	male	70	LCM
	ND	male	70	LCM
24	HG	male	72	LCM
	LG	male	72	LCM
	ND	male	72	LCM
